# Supplementary material
Source: PubMed Central journal article supplement (PMC524289)
Supplement: nar_32_18_5379__1.pdf [file nar_32_18_5379__1.pdf]

Table S1 : Prey Interaction Domains.

| Bait  | Prey  | Prey size<br>(aa) | Start of<br>ID <sup>a</sup> | End of<br>ID <sup>b</sup> | ID <sup>c</sup> |
|-------|-------|-------------------|-----------------------------|---------------------------|-----------------|
| Med5  | Med1  | 566               | 137                         | 566                       | 137-566         |
| Med5  | Med16 | 974               | -20                         | 510                       | 1-510           |
| Med7  | Med10 | 157               | 2                           | 157                       | 101-157         |
|       |       |                   | 33                          | 157                       |                 |
|       |       |                   | 73                          | 157                       |                 |
|       |       |                   | 98                          | 157                       |                 |
|       |       |                   | 101                         | 157                       |                 |
| Med7  | Med4  | 284               | -3                          | 284                       | 76-260          |
|       |       |                   | 20                          | 284                       |                 |
|       |       |                   | 71                          | 284                       |                 |
|       |       |                   | 76                          | 260                       |                 |
| Med7  | Med21 | 140               | -6                          | 140                       | 58-140          |
|       |       |                   | 8                           | 140                       |                 |
|       |       |                   | 43                          | 140                       |                 |
|       |       |                   | 44                          | 140                       |                 |
|       |       |                   | 58                          | 140                       |                 |
| Med10 | Med7  | 222               | 45                          | 222                       | 111-203         |
|       |       |                   | 63                          | 222                       |                 |
|       |       |                   | 79                          | 212                       |                 |
|       |       |                   | 89                          | 222                       |                 |
|       |       |                   | 92                          | 222                       |                 |
|       |       |                   | 101                         | 222                       |                 |
|       |       |                   | 110                         | 222                       |                 |
|       |       |                   | 111                         | 203                       |                 |
| Med10 | Med14 | 1082              | 4                           | 287                       | 4-287           |
| Med10 | Med31 | 127               | 9                           | 127                       | 9-127           |
| Med11 | Med22 | 121               | 1                           | 121                       | 58-121          |
|       |       |                   | 58                          | 121                       |                 |
| Med17 | Med6  | 295               | 28                          | 221                       | 28-221          |
| Med17 | Med8  | 223               | 71                          | 218                       | 71-218          |
| Med17 | Med13 | 1420              | 790                         | 905                       | 790-905         |
| Med17 | Med21 | 140               | -4                          | 140                       | 1-140           |
| Med18 | Med8  | 223               | 38                          | 223                       | 190-223         |
|       |       |                   | 52                          | 223                       |                 |
|       |       |                   | 75                          | 223                       |                 |
|       |       |                   | 86                          | 223                       |                 |
|       |       |                   | 98                          | 223                       |                 |
|       |       |                   | 120                         | 223                       |                 |
|       |       |                   | 132                         | 223                       |                 |
|       |       |                   | 157                         | 223                       |                 |
|       |       |                   | 163                         | 223                       |                 |
|       |       |                   | 182                         | 223                       |                 |
|       |       |                   | 190                         | 223                       |                 |

|       |       |     |     |     |         |
|-------|-------|-----|-----|-----|---------|
| Med21 | Med3  | 431 | 59  | 268 | 59-268  |
| Med21 | Med4  | 284 | 71  | 235 | 71-235  |
| Med21 | Med7  | 222 | 29  | 146 | 131-146 |
|       |       |     | 43  | 222 |         |
|       |       |     | 55  | 222 |         |
|       |       |     | 63  | 222 |         |
|       |       |     | 79  | 213 |         |
|       |       |     | 95  | 222 |         |
|       |       |     | 105 | 222 |         |
|       |       |     | 106 | 222 |         |
|       |       |     | 110 | 222 |         |
|       |       |     | 111 | 208 |         |
|       |       |     | 115 | 222 |         |
|       |       |     | 131 | 222 |         |
| Med21 | Med10 | 157 | 36  | 157 | 74-157  |
|       |       |     | 41  | 157 |         |
|       |       |     | 73  | 157 |         |
|       |       |     | 74  | 157 |         |
| Med21 | Med31 | 127 | 1   | 127 | 1-127   |

<sup>a</sup>The position of the N-terminus of the Mediator subunit fragment is indicated for each selected clone.

<sup>b</sup>The position of the C-terminus of the Mediator subunit fragment is indicated for each selected clone.

<sup>c</sup>For a given prey selected by one particular Mediator subunit, the ID is defined by the clone which encodes the fragment beginning closest to the C-terminus of the protein and the clone whose encoded fragment finishes closest to the N-terminus.

Figure S1 legend : Med8 C-terminal conserved motif

Alignments compare Med8 C-terminus from *S. cerevisiae* (Sc, upper line) and human (Hs, lowerline) with that from *S. pombe* (Sp), *A. fumigata* (Af), *D. discoideum* (Dd), *A. thaliana* (At), *C. elegans* (Ce), and *D. melanogaster* (Dm). Flanking numbers indicate start positions in the complete peptide sequences. Solid and shaded backgrounds indicate identical or similar amino acids (aa), respectively, in at least two aligned sequences. Amino acids considered similar were R/K/H, A/S/T, I/L/V/M/C/F/Y/W, G/P, and E/D/Q/N. Positions are indicated with an asterisk if they harbor identical or similar aa in all eight sequences, or with a plus sign for three out of eight sequences. Predicted helical (H) secondary conformations are indicated above the alignment.

Guglielmi et al. Fig. S1

|    |     |              |   |
|----|-----|--------------|---|
|    |     | HHHHHHHHH    |   |
| Sc | 198 | VDDVLKFTFTGE |   |
| Sp | 188 | LTDILSFMKSGK |   |
| Af | 233 | LEDILRYMTTGV |   |
| Dd | 159 | LKDILSITMLGS |   |
| At | 200 | EKMLRDAVNDGK |   |
| Ce | 196 | TAKIVKSILFGE |   |
| Dm | 180 | TQLLVAAVGMGK |   |
| Hs | 178 | TNALVAAVAFGK |   |
|    |     | *+           | * |
